# Supplementary material for: Efficacy of parenteral vaccination against tuberculosis with heat-inactivated Mycobacterium bovis in experimentally challenged goats
Source: PLoS One. 2018 May 9;13(5):e0196948. doi: 10.1371/journal.pone.0196948 (PMC5942842; doi:10.1371/journal.pone.0196948)
Supplement: S2 Table — (XLSX) [file pone.0196948.s002.xlsx]

## Sheet: Hoja1
			Week 0			Week 3			Week 5			Week 8			Week 11			Week 13			Week 15			Week 17
Group	Route	Animal ID	BLANK	MPB83	MPB83	BLANK	MPB83	MPB83	BLANK	MPB83	MPB83	BLANK	MPB83	MPB83	BLANK	MPB83	MPB83	BLANK	MPB83	MPB83	BLANK	MPB83	MPB83	BLANK	MPB83	MPB83
Control	-	388	0.059	0.061	0.09	0.063	0.073	0.076	0.055	0.066	0.07	0.058	0.079	0.089	0.061	0.107	0.106	0.055	≥4.000	≥4.000	0.056	≥4.000	≥4.000	0.106	≥4.000	≥4.000
Control	-	376	0.077	0.083	0.09	0.063	0.069	0.069	0.06	0.069	0.066	0.055	0.078	0.082	0.061	0.067	0.088	0.059	≥4.000	≥4.000	0.059	≥4.000	≥4.000	0.064	≥4.000	≥4.000
Control	-	379	0.059	0.073	0.07	0.059	0.064	0.069	0.061	0.068	0.068	0.053	0.07	0.066	0.057	1.133	1.167	0.058	≥4.000	≥4.000	0.055	≥4.000	≥4.000	0.055	≥4.000	≥4.000
Control	-	374	0.085	0.142	0.2	0.072	0.1	0.101	0.074	0.083	0.08	0.056	0.113	0.124	0.056	0.063	0.062	0.057	≥4.000	≥4.000	0.057	≥4.000	≥4.000	0.058	3.582	3.254
Control	-	391	0.058	0.062	0.07	0.067	0.106	0.12	0.06	0.091	0.106	0.056	0.076	0.072	0.054	0.193	0.214	0.061	3.853	3.858	0.057	≥4.000	≥4.000	0.058	3.859	3.534
Control	-	351	0.06	0.071	0.068	0.06	0.07	0.085	0.055	0.081	0.104	0.059	0.069	0.07	0.059	0.069	0.066	0.059	≥4.000	≥4.000	0.057	≥4.000	≥4.000
Control	-	384	0.059	0.065	0.072	0.056	0.079	0.079	0.059	0.073	0.089	0.061	0.105	0.103	0.064	0.074	0.081	0.062	≥4.000	≥4.000	0.07	≥4.000	≥4.000	0.062	≥4.000	≥4.000
Control	-	372	0.09	0.084	0.081	0.08	0.069	0.07	0.08	0.079	0.09	0.071	0.086	0.081	0.081	0.194	0.206	0.077	3.796	3.951	0.074	≥4.000	≥4.000	0.075	≥4.000	≥4.000
BCG	S.C.	316	0.074	0.105	0.111	0.07	0.056	0.098	0.06	0.166	0.174	0.078	0.137	0.13	0.066	0.083	0.087	0.063	0.826	0.798	0.064	0.539	0.535	0.06	0.197	0.184
BCG	S.C.	321	0.058	0.075	0.093	0.063	0.177	0.204	0.06	0.152	0.16	0.06	0.078	0.076	0.069	0.065	0.075	0.068	0.195	0.174	0.071	0.225	0.193	0.061	0.082	0.082
BCG	S.C.	396	0.062	0.072	0.067	0.07	0.073	0.07	0.123	0.244	0.251	0.066	0.107	0.103	0.082	0.327	0.318	0.07	1.616	1.638	0.071	≥4.000	≥4.000	0.08	≥4.000	≥4.000
BCG	S.C.	367	0.064	0.076	0.074	0.075	0.091	0.091	0.079	0.081	0.089	0.063	0.072	0.059	0.066	0.08	0.062	0.066	1.587	1.421	0.1	2.22	1.753	0.072	1.098	0.985
BCG	S.C.	334	0.065	0.092	0.082	0.061	0.065	0.065	0.061	0.096	0.086	0.059	0.071	0.076	0.06	0.11	0.113	0.059	0.14	0.117	0.064	0.245	0.155	0.055	0.162	0.138
BCG	S.C.	383	0.063	0.07	0.067	0.068	0.088	0.088	0.063	0.09	0.091	0.069	0.086	0.076	0.06	0.168	0.08	0.062	0.075	0.083	0.059	3.666	3.876	0.062	3.397	3.398
BCG	S.C.	386	0.049	0.062	0.059	0.065	0.074	0.072	0.084	0.104	0.095	0.056	0.079	0.077	0.063	0.067	0.068	0.06	0.273	0.267	0.082	0.604	0.53	0.063	0.16	0.161
BCG	S.C.	337	0.055	0.064	0.064	0.075	0.127	0.102	0.059	0.097	0.089	0.059	0.074	0.073	0.067	0.098	0.082	0.059	1.405	1.398	0.072	0.746	0.748	0.061	0.259	0.295
HIMB	I.M.	373	0.061	0.061	0.078	0.058	≥4.000	≥4.000	0.063	≥4.000	≥4.000	0.061	≥4.000	≥4.000	0.064	≥4.000	≥4.000	0.077	≥4.000	≥4.000	0.095	≥4.000	≥4.000	0.067	≥4.000	≥4.000
HIMB	S.C.	411	0.067	0.068	0.078	0.063	0.066	0.064	0.056	0.082	0.058	0.063	0.065	0.069	0.068	0.069	0.072	0.068	≥4.000	≥4.000	0.081	≥4.000	≥4.000	0.067	≥4.000	≥4.000
HIMB	I.M.	318	0.063	0.067	0.071	0.06	≥4.000	≥4.000	0.079	≥4.000	≥4.000	0.065	≥4.000	≥4.000	0.063	≥4.000	≥4.000	0.166	≥4.000	≥4.000	0.119	≥4.000	≥4.000	0.124	≥4.000	≥4.000
HIMB	S.C.	339	0.061	0.081	0.079	0.082	≥4.000	≥4.000	0.063	≥4.000	≥4.000	0.055	≥4.000	≥4.000	0.059	≥4.000	≥4.000	0.076	≥4.000	≥4.000	0.07	≥4.000	≥4.000	0.059	≥4.000	≥4.000
HIMB	I.M.	333	0.057	0.065	0.068	0.066	3.326	3.307	0.055	≥4.000	≥4.000	0.058	≥4.000	≥4.000	0.057	≥4.000	≥4.000	0.054	≥4.000	≥4.000	1.759	≥4.000	≥4.000	0.061	≥4.000	≥4.000
HIMB	S.C.	385	0.071	0.078	0.084	0.057	≥4.000	≥4.000	0.058	≥4.000	≥4.000	0.057	≥4.000	≥4.000
HIMB	S.C.	377	0.096	0.111	0.093	0.1	≥4.000	3.995	0.077	≥4.000	≥4.000	0.063	≥4.000	≥4.000	0.063	≥4.000	≥4.000	0.071	≥4.000	≥4.000	0.062	≥4.000	≥4.000	0.058	≥4.000	≥4.000
HIMB	I.M.	350	0.072	0.094	0.089	0.08	≥4.000	≥4.000	0.073	≥4.000	≥4.000	0.06	≥4.000	≥4.000	0.052	≥4.000	≥4.000	0.058	≥4.000	≥4.000	0.058	≥4.000	≥4.000	0.056	≥4.000	≥4.000
